# Supplementary material for: Molecular subtypes, tumor microenvironment infiltration characterization and prognosis model based on cuproptosis in bladder cancer
Source: PeerJ. 2023 Apr 6;11:e15088. doi: 10.7717/peerj.15088 (PMC10083007; doi:10.7717/peerj.15088)
Supplement: Supplemental Information 12 [file peerj-11-15088-s012.xlsx]

## Sheet: Comparison between cells
					CDKN2A			CDKN2A					CDKN2A					CDKN2A
	RT4	18.02	34.24	-16.22	1.31007e-05		J82	14.19	20.21	-6.02	0.0154099	UMUC3	12.96	23.61	-10.65	0.000622344	T24
		17.48	34.41	-16.93	8.0087e-06			14.37	19.81	-5.44	0.0230355		13.43	23.95	-10.52	0.000681027
		16.96	33.43	-16.47	1.10163e-05			13.5	19.16	-5.66	0.0197774		12.99	24.05	-11.06	0.000468391
	5637	14.6	21.59	-6.99	0.00786684		SV-HUC-1	13.64	20.65	-7.01	0.00775854	UMUC3	DLAT		0	1
		14.22	21.47	-7.25	0.0065695			13.85	20.37		0.0217929		12.96	21.23	-8.27	0.00323953
		14.89	21.67	-6.78	0.00909948			14.35	21.01	-6.66	0.00988872		13.43	21.46	-8.03	0.00382586
					DLAT			DLAT					12.99	20.98	-7.99	0.00393342
	RT4	16.02	25.73	-9.71	0.00119398		J82	14.19	25.4	-11.21	0.000422137	UMUC3	DLD		0	1
		16.14	24.72	-8.58	0.00261314			14.37	24.76	-10.39	0.000745244		12.96	22.24	-9.28	0.00160858
		16.04	24.43	-8.39	0.00298098			13.5	24.45	-10.95	0.0005055		13.43	22.62	-9.19	0.00171212
	5637	14.25	23.37	-9.12	0.00179724		SV-HUC-1	13.64	21.92	-8.28	0.00321715		12.99	22.36	-9.37	0.00151129
		14.03	22.81	-8.78	0.00227487			14.85	21.75	-6.9	0.00837323	UMUC3	FDX1
		14.52	23.84	-9.32	0.00156459			14.35	22.23	-7.88	0.00424506		12.96	23.35	-10.39	0.000745244
				0	DLD			DLD					13.43	23.94	-9.92	0.00103224
	RT4	16.02	26.21	-10.19	0.00085606		J82	14.19	26.09	-11.9	0.000261663		12.99	22.09	-10.95	0.0005055
		16.14	26.04	-9.9	0.00104665			14.37	26.16	-11.79	0.000282395	UMUC3	GLS			1
		16.04	25.61	-9.57	0.00131566			13.5	25.97	-12.47	0.000176261		12.96	22.3	-9.34	0.00154305
	5637	14.25	25.53	-11.28	0.000402144		SV-HUC-1	13.64	25.35	-11.71	0.000298496		13.43	22.84	-9.41	0.00146997
		14.03	26.1	-12.07	0.000232578			14.85	25.89	-11.04	0.000474929		12.99	22.72	-9.73	0.00117755
		14.52	25.36	-10.84	0.00054555			14.35	24.95	-10.6	0.000644291	UMUC3	LIAS		0	1
				0	FDX1			FDX1					12.96	22.06	-9.1	0.00182233
	RT4	16.02	24.99	-8.97	0.00199416		J82	14.19	26.53	-12.34	0.000192881		13.43	21.39	-7.96	0.00401607
		16.14	24.81	-8.67	0.0024551			14.37	26.95	-12.58	0.000163321		12.99	22.2	-9.21	0.00168855
		16.04	24.75	-8.71	0.00238797			13.5	26.34	-12.84	0.000136388	UMUC3	LIPT		0	1
	5637	14.25	25.15	-10.9	0.000523327		SV-HUC-1	13.64	25.46	-11.82	0.000276583		12.96	23.6	-10.64	0.000626673
		14.03	25.83	-11.8	0.000280444			14.85	25.5	-10.65	0.000622344		13.43	23.66	-10.23	0.000832651
		14.52	25.51	-10.99	0.000491678			14.35	25.43	-11.08	0.000461942		12.99	23.7	-10.71	0.000596992
				0	GLS			GLS			1	UMUC3	MIF		0	1
	RT4	16.02	24.19	-8.17	0.00347204		J82	14.19	26.9	-12.71	0.000149248		12.96	24.74	-11.78	0.000284359
		16.14	23.66	-7.52	0.00544822			14.37	26.24	-11.87	0.000267162		13.43	25.2	-11.77	0.000286337
		16.04	23.93	-7.89	0.00421574			13.5	25.97	-12.47	0.000176261		12.99	25.39	-12.4	0.000185024
	5637	14.25	25.07	-10.82	0.000553166		SV-HUC-1	13.64	25.39	-11.75	0.000290334	UMUC3	PDHA		0	1
		14.03	25.13	-11.1	0.000455583			14.85	25.45	-10.6	0.000644291		12.96	22.52	-9.56	0.00132481
		14.52	24.76	-10.24	0.0008269			14.35	25.45	-11.1	0.000455583		13.43	22	-8.57	0.00263132
				0	LISA			LISA					12.99	21.89	-8.9	0.00209331
	RT4	16.02	23.7	-7.68	0.00487629		J82	14.19	24.75	-10.56	0.000662404	UMUC3	PDHB		0	1
		16.14	23.91	-7.77	0.00458139			14.37	24.45	-10.08	0.000923884		12.96	20.42	-7.46	0.00567958
		16.04	23.9	-7.86	0.00430432			13.5	24.3	-10.8	0.000560888		13.43	19.96	-6.53	0.0108212
	5637	14.25	23.8	-9.55	0.00133402		SV-HUC-1	13.64	23.28	-9.64	0.00125335		12.99	20.01	-7.02	0.00770494
		14.03	23.84	-9.81	0.00111403			14.85	22.48	-7.63	0.00504825	UMUC3	IGF2BP2		0	1
		14.52	23.89	-9.37	0.00151129			14.35	22.95	-8.6	0.00257716		12.96	19.03	-6.07	0.014885
				0	LIPT		J82	LIPT					13.43	18.6	-5.17	0.0277763
	RT4	16.02	24.98	-8.96	0.00200803			14.19	26.52	-12.33	0.000194223		12.99	19.25	-6.26	0.0130482
		16.14	24.76	-8.62	0.00254168			14.37	26.16	-11.79	0.000282395	UMUC3	CD44		0	1
		16.04	24.14	-8.1	0.00364466		SV-HUC-1	13.5	26.02	-12.52	0.000170257		12.96	17.47	-4.51	0.0438889
	5637	14.25	25.99	-11.74	0.000292353		7	13.64	24.91	-11.27	0.000404941		13.43	16.82	-3.39	0.0953912
		14.03	25.46	-11.43	0.000362433			14.85	24.96	-10.11	0.000904871		12.99	16.91	-3.92	0.0660636
		14.52	25.73	-11.21	0.000422137			14.35	24.9	-10.55	0.000667012	UMUC3	GATA3		0	1
				0	MIF			MIF					12.96	25.61	-12.65	0.000155586
	RT4	16.02	27.07	-11.05	0.000471649		J82	14.19	28.06	-13.87	6.67904e-05		13.43	25.39	-11.96	0.000251004
		16.14	26.71	-10.57	0.000657829			14.37	28.25	-13.88	6.6329e-05		12.99	25.55	-12.56	0.000165601
		16.04	26.18	-10.14	0.000886249			13.5	27.49	-13.99	6.14597e-05	UMUC3	FGFR3		0	1
	5637	14.25	26.25	-12	0.000244141		SV-HUC-1	13.64	26.05	-12.41	0.000183746		12.96	25.81	-12.85	0.000135445
		14.03	26.12	-12.09	0.000229376			14.85	26.04	-11.19	0.00042803		13.43	26.34	-12.91	0.000129928
		14.52	26.57	-12.05	0.000235824			14.35	26.1	-11.75	0.000290334		12.99	25.11	-12.12	0.000224655
				0	PDHA			PDHA
	RT4	16.02	24.44	-8.42	0.00291963		J82	14.19	24.06	-9.87	0.00106865
		16.14	24.14	-8	0.00390625			14.37	24.06	-9.69	0.00121065
		16.04	23.88	-7.84	0.0043644			13.5	23.47	-9.97	0.000997082
	5637	14.25	22.6	-8.35	0.00306478		SV-HUC-1	13.64	23.35	-9.71	0.00119398
		14.03	22.63	-8.6	0.00257716			14.25	23.81	-9.56	0.00132481
		14.52	22.34	-7.82	0.00442533			14.35	23.48	-9.13	0.00178483
				0	PDHB			PDHB
	RT4	16.02	22.56	-6.54	0.0107464		J82	14.19	21.63	-7.44	0.00575886
		16.14	22.38	-6.24	0.0132304			14.37	21.45	-7.08	0.00739108
		16.04	22.23	-6.19	0.013697			13.5	22.08	-8.58	0.00261314
	5637	14.25	22.51	-8.26	0.00326206		SV-HUC-1	13.64	21.63	-7.99	0.00393342
		14.03	22.6	-8.57	0.00263132			14.85	21.36	-6.51	0.0109722
		14.52	21.84	-7.32	0.00625836			14.35	21.55	-7.2	0.00680118
				0	IGF2BP2			IGF2BP2			1
	RT4	16.02	23.85	-7.83	0.00439476		J82	14.19	22.41	-8.22	0.00335377
		16.14	23.86	-7.72	0.00474295			14.37	22.36	-7.99	0.00393342
		16.04	23.88	-7.84	0.0043644			13.5	22.37	-8.87	0.00213729
	5637	14.25	22.32	-8.07	0.00372124		SV-HUC-1	13.64	20.96	-7.32	0.00625836
		14.03	21.91	-7.88	0.00424506			14.35	21.41	-7.06	0.00749425
		14.52	21.61	-7.09	0.00734002			14.35	21.27	-6.92	0.00825795
				0	CD44			CD44
	RT4	18.02	23.17	-5.15	0.0281641		J82	16.23	20.81	-4.58	0.0418102
		17.48	23.17	-5.69	0.0193704			15.08	20.36	-5.28	0.0257372
		16.96	22.74	-5.78	0.018199			15.74	20.67	-4.93	0.0328036
	5637	14.6	20.22	-5.62	0.0203335		SV-HUC-1	15.62	22.32	-6.7	0.00961832
		14.22	20.43	-6.21	0.0135084			15.87	22.48	-6.61	0.0102374
		14.89	20.03	-5.14	0.02836			15.84	22.61	-6.77	0.00916277
				0	GATA3			GATA3
	RT4	18.02	22.38	-4.36	0.0486978		J82	16.23	29.57	-13.34	9.64406e-05
		17.48	22.29	-4.81	0.0356489			15.08	29.09	-14.01	6.06136e-05
		16.96	21.5	-4.54	0.0429857			15.74	29.07	-13.33	9.71114e-05
	5637	14.6	25.32	-10.72	0.000592869		SV-HUC-1	15.62	24.03	-8.41	0.00293994
		14.22	25.02	-10.8	0.000560888			15.87	23.84	-7.97	0.00398833
		14.89	25.09	-10.2	0.000850147			15.84	24.46	-8.62	0.00254168
				0	FGFR3			FGFR3
	RT4	18.02	22.67	-4.65	0.03983		J82	16.23	31.32	-15.09	2.8672e-05
		17.48	22.93	-5.45	0.0228763			15.08	31.04	-15.96	1.56878e-05
		16.96	21.98	-5.02	0.0308198			15.74	30.95	-15.21	2.63836e-05
	5637	14.6	28.31	-13.71	7.4624e-05		SV-HUC-1	15.62	26.24	-10.62	0.000635421
		14.22	27.9	-13.68	7.61921e-05			15.87	25.81	-9.94	0.00101803
		14.89	28.79	-13.9	6.54159e-05			15.84	26.18	-10.34	0.000771525

## Sheet: SV-HUC-1.T24
	14.63	23.35	23.36	26.19	25.8	26.99	23.66	25.34	27.3	24.3	22.51	22.01
	15.03	22.61	23.44	25	26.11	26.37	23.7	25.17	26.86	24.2	22.34	21.47
	14.19	22.14	22.97	24.8	25.56	25.97	23.33	25.04	26.29	23.24	22.28	22
	14.26	24.42	23.23	25.7	25.43	23.6	23.4	24.85	26.1	23.79	22.06	21.23
	14.61	24.75	23.08	25.25	25.21	23.33	23.22	25.13	25.95	23.93	21.82	20.93
	15.18	26.15	23.02	25.83	25.48	24.11	23.52	25.04	26.6	24.06	21.86	20.92
	21.66	20.67	18.21	23.28	23.3	27.99	24.86	25.02	27.84
	21.29	18.22	18.15	23.39	28.12	28.12	25.14	27.61	27.78
				CDKN2A								GLS
SV-HUC-1	14.63	23.35	-8.72	0.00237147	0.00388059	0.611047	SV-HUC-1	14.63	26.99	-12.36	0.000190226	0.000286782	0.663311
	15.03	22.61	-7.58	0.00522628		1.34663		15.03	26.37	-11.34	0.000385762		1.34514
	14.19	22.14	-7.95	0.004044		1.042		14.19	25.97	-11.78	0.000284359		0.991549
T24	14.26	24.42	-10.16	0.000874048		0.225212	T24	14.26	23.6	-9.34	0.00154305		5.38056
	14.61	24.75	-10.14	0.000886249		0.228356		14.61	23.33	-8.72	0.00237147		8.26925
	15.18	26.15	-10.97	0.000498541		0.128457		15.18	24.11	-8.93	0.00205023		7.14907
			0	DLAT						0	1	LIAS
SV-HUC-1	14.63	23.36	-8.73	0.00235509	0.0025233	0.933339	SV-HUC-1	14.63	23.66	-9.03	0.00191293	0.00204684	0.934575
	15.03	23.44	-8.41	0.00293994		1.16512		15.03	23.7	-8.67	0.0024551		1.19946
	14.19	22.97	-8.78	0.00227487		0.901546		14.19	23.33	-9.14	0.0017725		0.865966
T24	14.26	23.23	-8.97	0.00199416		0.7903	T24	14.26	23.4	-9.14	0.0017725		0.865966
	14.61	23.08	-8.47	0.00282017		1.11765		14.61	23.22	-8.61	0.00255936		1.25039
	15.18	23.02	-7.84	0.0043644		1.72964		15.18	23.52	-8.34	0.0030861		1.50774
			0	DLD						0	1	LIPT
SV-HUC-1	14.63	26.19	-11.56	0.000331202	0.000656042	0.504849	SV-HUC-1	14.63	25.34	-10.71	0.000596992	0.000675008	0.884423
	15.03	25	-9.97	0.000997082		1.51985		15.03	25.17	-10.14	0.000886249		1.31295
	14.19	24.8	-10.61	0.000639841		0.975305		14.19	25.04	-10.85	0.000541782		0.802631
T24	14.26	25.7	-11.44	0.000359929		0.548637	T24	14.26	24.85	-10.59	0.000648772		0.961133
	14.61	25.25	-10.64	0.000626673		0.955233		14.61	25.13	-10.52	0.000681027		1.00892
	15.18	25.83	-10.65	0.000622344		0.948635		15.18	25.04	-9.86	0.00107608		1.59417
			0	FDX1						0		MIF
SV-HUC-1	14.63	25.8	-11.17	0.000434005	0.00042459	1.02217	SV-HUC-1	14.63	27.3	-12.67	0.000153444	0.000218636	0.701824
	15.03	26.11	-11.08	0.000461942		1.08797		15.03	26.86	-11.83	0.000274672		1.2563
	14.19	25.56	-11.37	0.000377823		0.889854		14.19	26.29	-12.1	0.000227791		1.04187
T24	14.26	25.43	-11.17	0.000434005		1.02217	T24	14.26	26.1	-11.84	0.000272775		1.24762
	14.61	25.21	-10.6	0.000644291		1.51744		14.61	25.95	-11.34	0.000385762		1.76441
	15.18	25.48	-10.3	0.000793215		1.86819		15.18	26.6	-11.42	0.000364953		1.66923
										0		PDHA
							SV-HUC-1	14.63	24.3	-9.67	0.00122755	0.00161672	0.759284
								15.03	24.2	-9.17	0.00173602		1.07379
								14.19	23.24	-9.05	0.00188659		1.16693
							T24	14.26	23.79	-9.53	0.00135265		0.836659
								14.61	23.93	-9.32	0.00156459		0.967754
								15.18	24.06	-8.88	0.00212253		1.31286
										0		PDHB
							SV-HUC-1	14.63	22.51	-7.88	0.00424506	0.00473899	0.895774
								15.03	22.34	-7.31	0.00630189		1.3298
								14.19	22.28	-8.09	0.00367001		0.77443
							T24	14.26	21.06	-6.8	0.00897421		1.8937
								14.61	21.82	-7.21	0.0067542		1.42524
								15.18	21.86	-6.68	0.00975258		2.05795
										0		IGF2BP2
							SV-HUC-1	14.63	22.01	-7.38	0.00600342	0.00732575	0.819495
								15.03	21.47	-6.44	0.0115177		1.57222
								14.19	22	-7.81	0.00445611		0.60828
							T24	14.26	21.23	-6.97	0.00797666		1.08885
								14.61	20.93	-6.32	0.0125167		1.70859
								15.18	20.92	-5.74	0.0187106		2.55409
										0	1	CD44
							SV-HUC-1	14.63	21.66	-7.03	0.00765172	0.0106342	0.719536
								15.03	21.29	-6.26	0.0130482		1.227
								14.19	20.67	-6.48	0.0112028		1.05346
							T24	14.26	18.22	-3.96	0.0642571		6.04247
								14.61	18.21	-3.6	0.0824692		7.75506
								15.18	18.15	-2.97	0.127627		12.0015
										0	1	GATA3
							SV-HUC-1	14.63	23.28	-8.65	0.00248938	0.00244758	1.01708
								15.03	23.39	-8.36	0.00304361		1.24352
								14.19	23.3	-9.11	0.00180974		0.739402
							T24	14.26	28.12	-13.86	6.7255e-05		0.0274782
								14.61	27.99	-13.38	9.38034e-05		0.038325
								15.18	28.12	-12.94	0.000127254		0.0519919
										0	1	FGFR3
							SV-HUC-1	14.63	24.86	-10.23	0.000832651	0.000762289	1.0923
								15.03	25.14	-10.11	0.000904871		1.18704
								14.19	25.02	-10.83	0.000549345		0.720652
							T24	14.26	27.61	-13.35	9.57744e-05		0.125641
								14.61	27.84	-13.23	0.000104081		0.136538
								15.18	27.78	-12.6	0.000161073		0.211301
